# Supplementary material for: Surface and subsurface characterisation of salt pans expressing polygonal patterns
Source: Copernicus journal article supplement (doi:10.5194/essd-2020-86), 2020-05-28
Supplement: Supplementary file [file essd-2020-86-AC2-supplement.pdf]

# Data set changes - 2020-09-01

## Salt concentration data (DOI: 10.1594/PANGAEA.911059)

### Owens\_lake\_T32-1-L1\_P3\_salt-conc

- replaced 0 with NaN values
- removed (17,1) to (17,9) and (18,1) to (18,9) direct salt measurements. Found lab notes that for these measurements there was a mixup of dishes in the lab
- removed (14,1) to (14,9) and (15,1) to (15,9) direct salt measurements. Did not find lab notes indicating potential mixups or contamination but the results from the direct measurements do not look trustworthy when compared to the indirect measurements.

### OwensLake-T27-S\_salt-conc

- removed all negative values from the direct salt measurement. These should have been missing values (the crystallization dishes were dropped, according to the lab notes) but were wrongly calculated and included

### OwensLake\_porewater

- removed entries from column "measurement\_error" for cases with  $\leq 2$  measurements
- swapped entries from columns "z" and "x" for site T25-3\_P2 and T16 (these were in the wrong order)
- added a depth entry (depth of 0 m) to entries from site T16 (these samples were drawn from water pooling into the bore holes)
- converted entries in column "Dinstance from left ridge" from centimeters to meters
- renamed T-10-3 -> T-10-3\_P1, T16 -> T16\_P1 and T16\_validation -> T16\_P1\_validation to be consistent with the other data sets

## Salt characterization data (DOI: 10.1594/PANGAEA.911239)

### OwensLake\_crustsaltspecs

- renamed T2-5 -> T2-5\_P1 and T10-3 -> T10-3\_P1 to be consistent with the other data sets
- renamed column "Perc [%] (Sodium Hydrogen Carbonate Hyd...)" -> "Perc [%] (Trona,  $\text{Na}_3(\text{HCO}_3)(\text{CO}_3)\cdot 2\text{H}_2\text{O}$ )"
- renamed column "Perc [%] (Sodium Chloride)" -> "Perc [%] (Halite, NaCl)"
- renamed column "Perc [%] (Sodium Carbonate Sulfate)" -> "Perc [%] (Burkeite,  $\text{Na}_6(\text{CO}_3)(\text{SO}_4)_2$ )"
- renamed column "Perc [%] (Sodium Sulfate)" -> "Perc [%] (Thenardite,  $\text{Na}_2\text{SO}_4$ )"
- renamed column "Perc [%] (Calcium Carbonate)" -> "Perc [%] (Calcite,  $\text{CaCO}_3$ )"
- renamed column "Perc [%] (Sodium Calcium Aluminum Silicate)" -> "Perc [%] (Albite,  $\text{NaAlSi}_3\text{O}_8$ )"

- renamed column "Perc [%] (Sodium Hydrogen Carbonate)" -> "Perc [%] (Nahcolite, NaHCO<sub>3</sub>)"
- renamed column "Perc [%] (Sodium Calcium Manganese Tita...)" -> "Perc [%] (Janhaugite, (Na,Ca)<sub>3</sub>(Mn,Fe)<sub>3</sub>(Ti,Zr,Nb)<sub>2</sub>Si<sub>4</sub>O<sub>16</sub>(OH,F)<sub>2</sub>)"
- renamed column "Perc [%] (Silicon Oxide)" -> "Perc [%] (Quartz, SiO<sub>2</sub>)"
- renamed column "Perc [%] (Potassium Aluminum Silicate)" -> "Perc [%] (Orthoclase, KAlSi<sub>3</sub>O<sub>8</sub>)"
- renamed column "Perc [%] (Magnesium Calcium Carbonate)" -> "Perc [%] (Siderophyllite, KFe<sub>2</sub>Al(Al<sub>2</sub>Si<sub>2</sub>)O<sub>10</sub>(F,OH)<sub>2</sub>)"
- renamed column "Perc [%] (Magnesium Calcium Carbonate)" -> "Perc [%] (Huntite, Mg<sub>3</sub>Ca(CO<sub>3</sub>)<sub>4</sub>)"
- renamed column "Perc [%] (Calcium Hydrogen Phosphate Hy...)" -> "Perc [%] (CaHPO<sub>4</sub>)"
- removed columns "Perc [%] (Strontium Cesium Aluminum Silicate)", "Perc [%] (Antimony Oxide)", "Perc [%] (Magnesium Iron Iron Aluminum )" and "Perc [%] (Calcium Hydroxide)" since these entries only referred to a trace elements
- removed two superfluous rows at the end of the table
- data abstract corrected to read "Pore water was collected from the subsurface at two sites at Badwater Basin (also central California) and 10 sites at Owens Lake."

## Temperature & humidity data (DOI: 10.1594/PANGAEA.911139)

### OwensLake\_T27-A\_P1\_Temp\_center

- removed 6 entries at the beginning
- removed one entry at the end

### OwensLake\_T27-A\_P1\_Temp\_center2

- removed 6 entries at the beginning
- removed one entry at the end

### OwensLake\_T29-3\_P1\_Temp\_center

- removed 6 entries at the beginning
- removed two entries at the end

### OwensLake\_T29-3\_P1\_TempRH\_ridge

- removed 19 entries at the beginning

### OwensLake\_T36-3\_P1\_TempRH\_center

- removed 23 entries at the beginning

### OwensLake\_T36-3\_P1\_TempRH\_ridge

- removed 47 entries at the beginning
